# Supplementary material for: The fabrication of robust and highly efficient oil–water separation filters via the high temperature sintering of silica micropower
Source: RSC Adv. 2024 Apr 25;14(19):13489–93. doi: 10.1039/d4ra02534b (PMC11043794; doi:10.1039/d4ra02534b)
Supplement: RA-014-D4RA02534B-s003 [file RA-014-D4RA02534B-s003.pdf]

## The Fabrication of Robust and Highly Efficient Oil-water Separation Filters *via* the High Temperature Sintering of Silica Micropower

### Electronic supplementary material (ESI†)

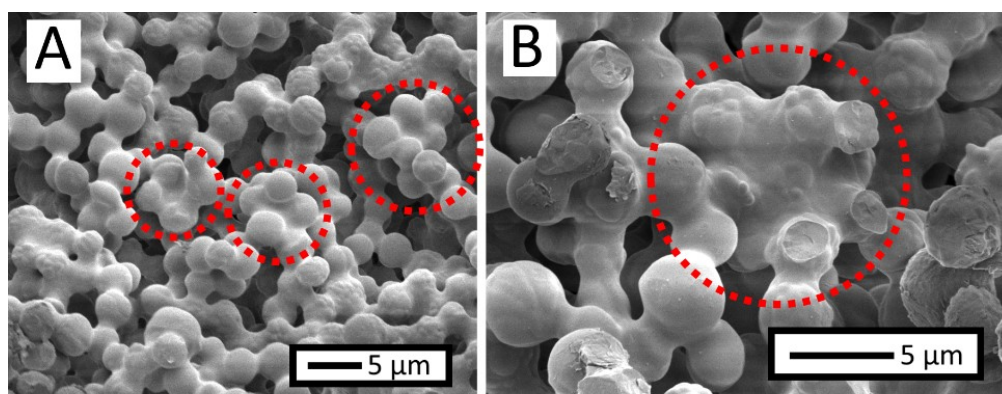

**Figure S1.** SEM micrographs of a surface showing the merging together of multiple particles at sintering temperatures of A) 945 °C, and B) 980 °C.

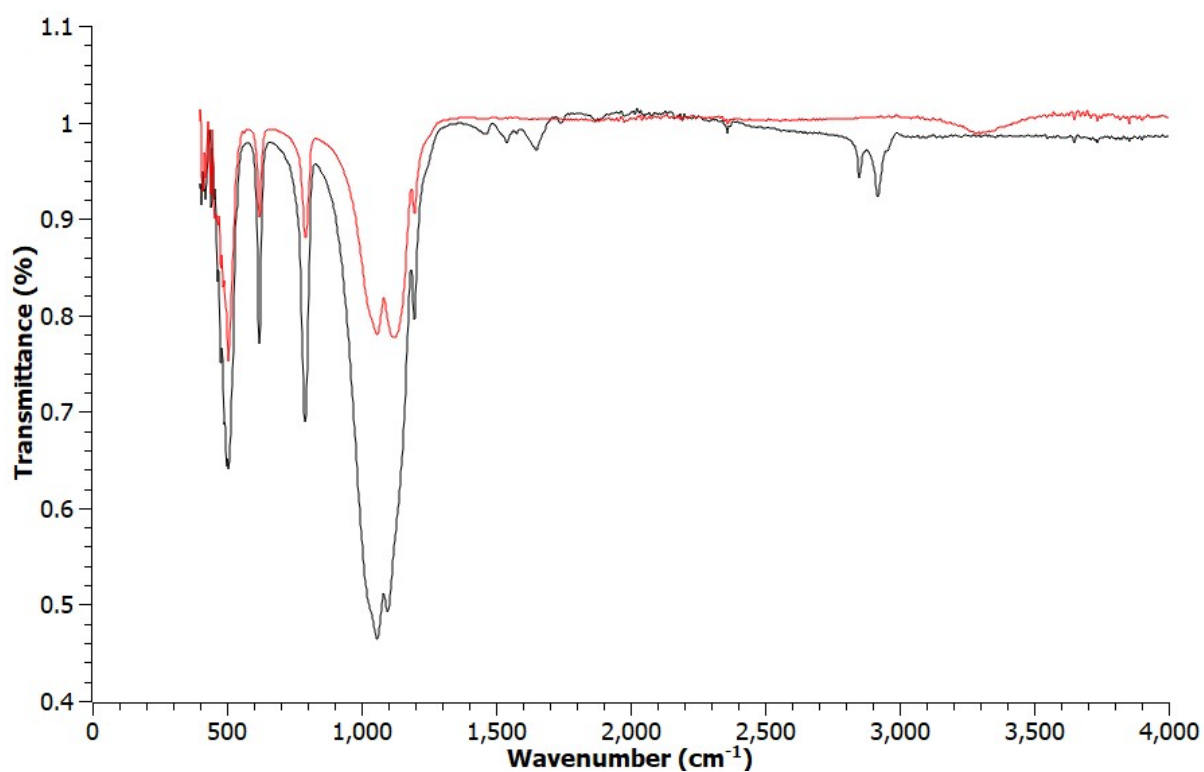

**Figure S2** FTIR spectra of sintered silica nanoparticles before (red) and after (black) HMDS functionalisation.

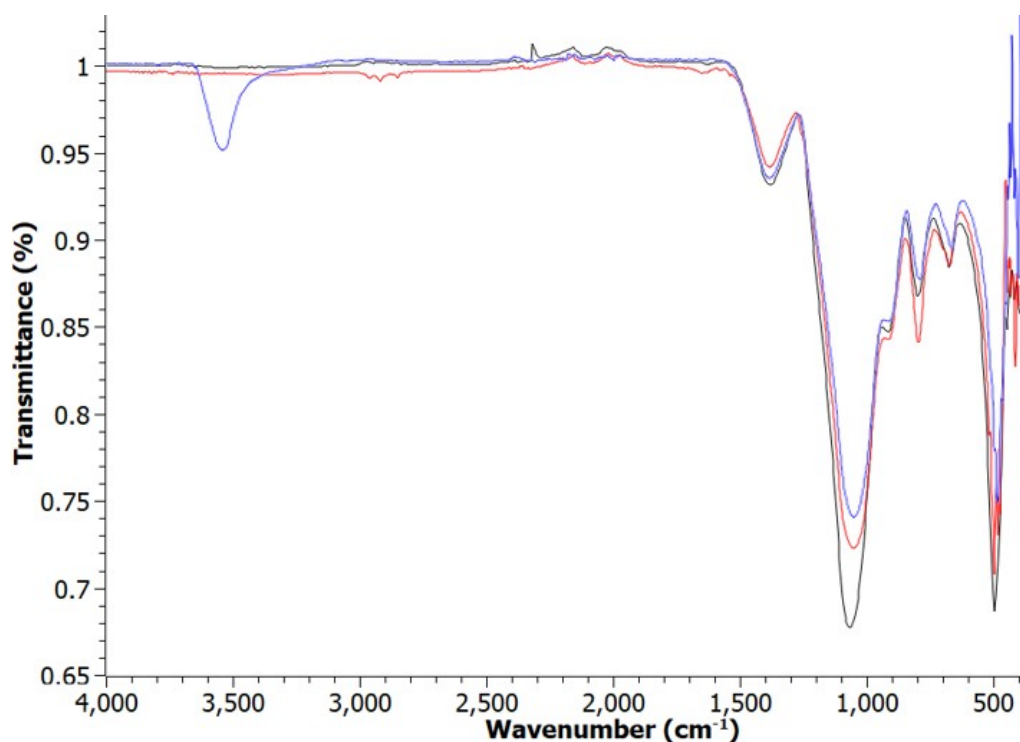

**Figure S3** FTIR spectra of blue) as received borosilicate, black) Sintered borosilicate and red) after attempted functionalisation with HMDS. Notably, after sintering the -OH peak ( $\sim 3500\text{ cm}^{-1}$ ) disappears suggesting that dehydration occurred at the high sintering temperatures. Small peaks at  $\sim 2940\text{ cm}^{-1}$  are indicative of  $\text{CH}_3$  stretches on the HMDS functionalised sample.

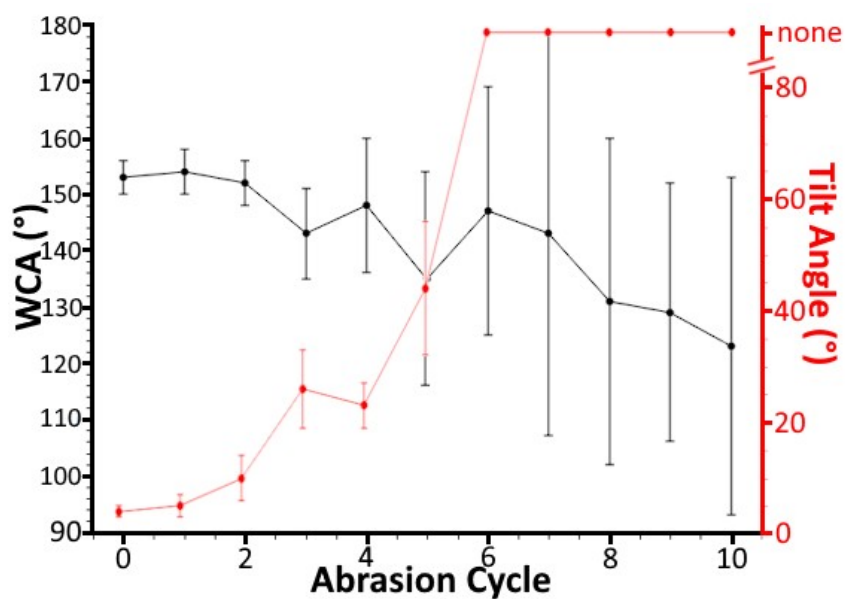

**Figure S4** Average WCA and Tilt angles after sandpaper abrasions.

| Sintering Temperature (°C) | Collected Volume (mL) | Separation Efficiency (%) |
|----------------------------|-----------------------|---------------------------|
| 910                        | 49.0                  | 98.0                      |
| 945                        | 48.2                  | 96.4                      |
| 980                        | 47.8                  | 95.6                      |

**Table S1** Oil/water Separation data for the separation of 1:1 mixture consisting of water (50 mL) and

chloroform (50 mL). Separation efficiency is calculated following [  $\eta(\%) = \left( \frac{v_2}{v_1} \right) \times 100\%$  ] where  $v_1$  is the initial volume of hydrophobic solvent and  $v_2$  the collected volume.
